CORRECTION

# Correction: Attitudes, practices, and zoonoses awareness of community members involved in the bushmeat trade near Murchison Falls National Park, northern Uganda

BreeAnna M. Dell, Marcy J. Souza, Adam S. Willcox

The images for [Figs 2](#) and [4](#) are incorrectly switched. The image that appears as [Fig 2](#) should be [Fig 4](#), and the image that appears as [Fig 4](#) should be [Fig 2](#). The figure captions appear in the correct order. Please see the images and captions in the correct order below.

## Reference

1. Dell BM, Souza MJ, Willcox AS. Attitudes, practices, and zoonoses awareness of community members involved in the bushmeat trade near Murchison Falls National Park, northern Uganda. PLoS ONE. 2020;15(9):e0239599. <https://doi.org/10.1371/journal.pone.0239599> PMID: [32986741](https://pubmed.ncbi.nlm.nih.gov/32986741/)

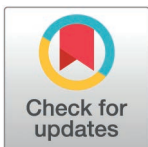

## OPEN ACCESS

**Citation:** Dell BM, Souza MJ, Willcox AS (2025) Correction: Attitudes, practices, and zoonoses awareness of community members involved in the bushmeat trade near Murchison Falls National Park, northern Uganda. PLoS One 20(5): e0325743. <https://doi.org/10.1371/journal.pone.0325743>

**Published:** May 29, 2025

**Copyright:** © 2025 Dell et al. This is an open access article distributed under the terms of the [Creative Commons Attribution License](https://creativecommons.org/licenses/by/4.0/), which permits unrestricted use, distribution, and reproduction in any medium, provided the original author and source are credited.

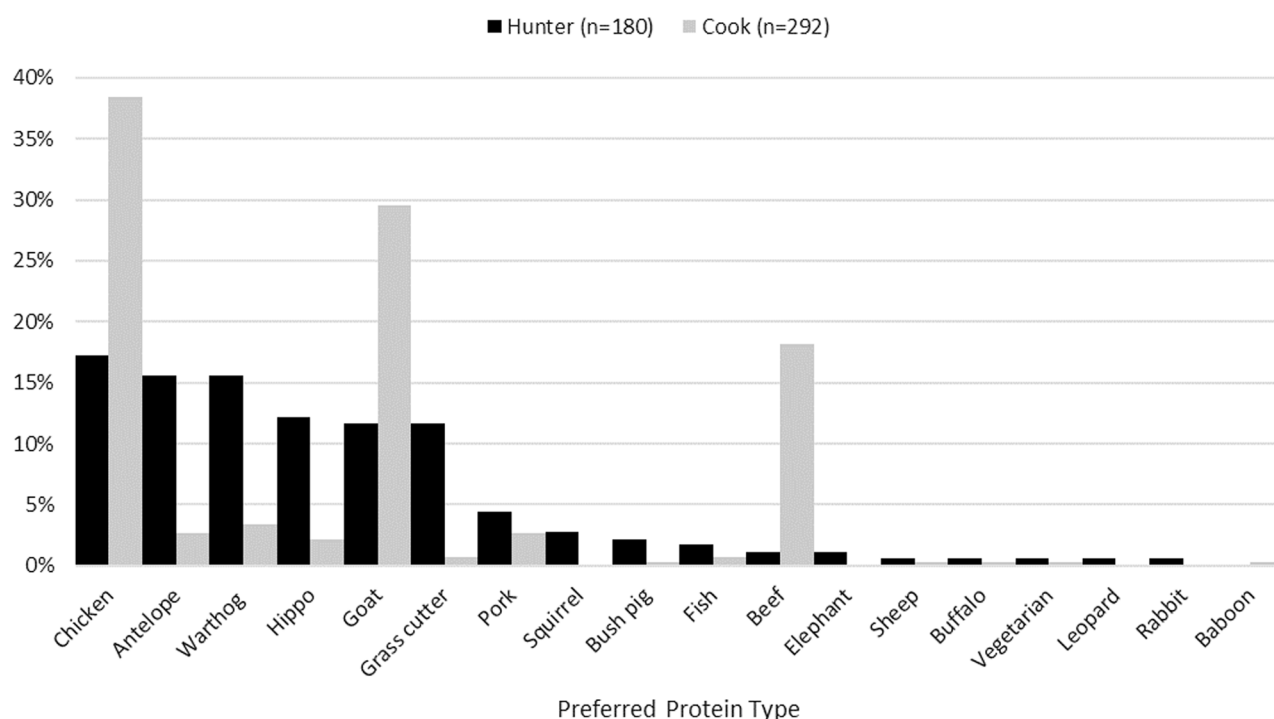

**Fig 2. Cook and hunter responses to which type of meat they most prefer to eat from among wild and domestic choices in Nwoya district, Uganda, 2016–2017.**

<https://doi.org/10.1371/journal.pone.0325743.g002>

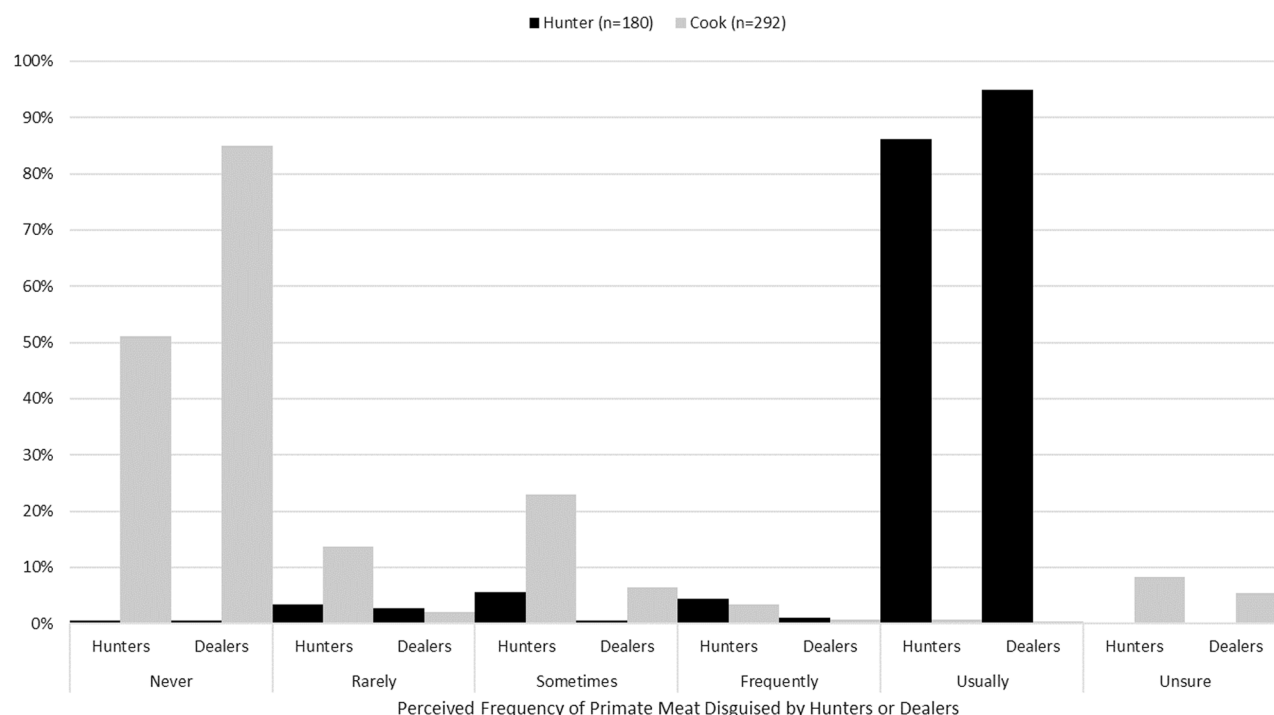

**Fig 4. Cook and hunter responses to how often hunters and dealers disguise primate meat as another kind of meat to sell in Nwoya district, Uganda, 2016–2017.** Independent t-tests show a significant difference in mean responses between cooks and hunters for both questions about how frequently hunters disguise primate meat ( $t_{437.8} = -35.3$ ,  $p < 0.001$ ) and how frequently dealers disguise primate meat ( $t_{392.0} = -63.3$ ).

<https://doi.org/10.1371/journal.pone.0325743.g004>
